# Supplementary material for: Analysis of Volatile Compounds in Jinhua ham Using Three Extraction Methods Combined with Gas Chromatography–Time-of-Flight Mass Spectrometry
Source: MDPI journal article supplement (doi:10.3390/foods11233897), 2022-12-02
Supplement: s1 [file s1]

**Table S1. Identified volatile components in *Jinhua ham* by three extraction methods (SPME, NT and SAFE)**

| Relative percentage content (%) |                 |            |                          |                         |                         |                         |                         |                         |                         |                         |                         |                         |
|---------------------------------|-----------------|------------|--------------------------|-------------------------|-------------------------|-------------------------|-------------------------|-------------------------|-------------------------|-------------------------|-------------------------|-------------------------|
| Compounds <sup>1</sup>          | RI <sup>2</sup> | CAS        | Identification<br>method | SPME                    |                         |                         | NT                      |                         |                         | SAFE                    |                         |                         |
|                                 |                 |            |                          | One- year               | Two- year               | Three- year             | One- year               | Two- year               | Three- year             | One- year               | Two- year               | Three- year             |
|                                 |                 |            |                          | aging                   |
| Aldehyde                        |                 |            |                          |                         |                         |                         |                         |                         |                         |                         |                         |                         |
| Hexanal                         | 1069.1          | 66-25-1    | RI, MS                   | 5.69±2.26 <sup>a</sup>  | 3.57±1.83 <sup>bc</sup> | 0.84±0.11 <sup>c</sup>  | 1.45±1.37 <sup>bc</sup> | 2.02±1.35 <sup>bc</sup> | 0.48±0.44 <sup>c</sup>  | 1.21±0.91 <sup>bc</sup> | 0.54±0.15 <sup>c</sup>  | 0.69±0.21 <sup>c</sup>  |
| Octanal                         | 1353.7          | 124-13-0   | RI, MS                   | 1.15±1.32 <sup>ab</sup> | 1.08±1.08 <sup>ab</sup> | 1.53±0.59 <sup>a</sup>  | 0.08±0.08 <sup>b</sup>  | 0.00±0.01 <sup>b</sup>  | 0.28±0.04 <sup>b</sup>  | 0.14±0.09 <sup>b</sup>  | 0.05±0.01 <sup>b</sup>  | 0.10±0.04 <sup>b</sup>  |
| Nonanal                         | 1483.2          | 124-19-6   | RI, MS                   | 2.73±1.37 <sup>a</sup>  | 1.88±0.25 <sup>a</sup>  | 1.97±0.47 <sup>a</sup>  | 0.43±0.30 <sup>b</sup>  | 0.66±0.41 <sup>b</sup>  | 0.28±0.04 <sup>b</sup>  | 0.49±0.24 <sup>b</sup>  | 0.16±0.03 <sup>b</sup>  | 0.36±0.11 <sup>b</sup>  |
| Acetaldehyde                    | 531.1           | 75-07-0    | RI, MS                   | 0.35±0.30               | 0.69±0.63               | 2.15±0.33               | 2.50±2.50               | -                       | 2.49±1.87               | -                       | -                       | -                       |
| Trans-2-octenaldehyde           | 1509.4          | 2548-87-0  | RI, MS                   | 0.07±0.04 <sup>b</sup>  | 0.11±0.03 <sup>b</sup>  | 0.23±0.04 <sup>a</sup>  | 0.20±0.08 <sup>a</sup>  | 0.06±0.04 <sup>b</sup>  | 0.05±0.02 <sup>b</sup>  | 0.05±0.03 <sup>b</sup>  | 0.02±0.01 <sup>b</sup>  | 0.05±0.02 <sup>b</sup>  |
| 2-Methyl-propionaldehyde        | 595.2           | 78-84-2    | RI, MS                   | 1.21±1.05 <sup>b</sup>  | 1.60±0.16 <sup>b</sup>  | 2.97±0.21 <sup>a</sup>  | 0.89±0.70 <sup>b</sup>  | 0.68±0.95 <sup>b</sup>  | 0.29±0.24 <sup>b</sup>  | -                       | -                       | -                       |
| 3-Methylbutyraldehyde           | 740.6           | 590-86-3   | RI, MS                   | 13.29±0.57 <sup>a</sup> | 11.50±2.20 <sup>a</sup> | 5.64±2.68 <sup>b</sup>  | 0.36±0.26 <sup>c</sup>  | 2.48±3.17 <sup>bc</sup> | 1.58±1.12 <sup>bc</sup> | -                       | -                       | 0.08±0.08 <sup>c</sup>  |
| Benzaldehyde                    | 1553.3          | 100-52-7   | RI, MS                   | 2.17±0.31 <sup>a</sup>  | 1.82±0.07 <sup>a</sup>  | 2.04±0.16 <sup>a</sup>  | 0.49±0.23 <sup>b</sup>  | 0.69±0.20 <sup>b</sup>  | 0.47±0.18 <sup>b</sup>  | 0.58±0.29 <sup>b</sup>  | 0.28±0.05 <sup>b</sup>  | 0.34±0.17 <sup>b</sup>  |
| Acetaldehyde, tetramer          | 2483            | 108-62-3   | RI                       | 0.05±0.05               | 0.01±0.00               | 0.01±0.01               | 0.19±0.27               | 0.03±0.04               | 0.01±0.01               | -                       | -                       | -                       |
| Phenylacetaldehyde              | 1595.6          | 122-78-1   | RI, MS                   | 5.04±0.43 <sup>b</sup>  | 5.21±0.63 <sup>b</sup>  | 11.76±2.16 <sup>a</sup> | -                       | -                       | 0.47±0.33 <sup>c</sup>  | 4.35±3.87 <sup>bc</sup> | 1.39±1.22 <sup>bc</sup> | 3.16±3.36 <sup>bc</sup> |
| Trans-2-decenaldehyde           | 1630.8          | 3913-81-3  | RI, MS                   | 0.06±0.05 <sup>b</sup>  | 0.12±0.08 <sup>ab</sup> | 0.30±0.09 <sup>a</sup>  | -                       | -                       | 0.19±0.16 <sup>ab</sup> | 0.06±0.08 <sup>b</sup>  | 0.09±0.12 <sup>ab</sup> | -                       |
| Propionaldehyde                 | 578.1           | 123-38-6   | RI, MS                   | 0.02±0.03               | -                       | -                       | -                       | -                       | 0.00±0.00               | -                       | -                       | -                       |
| Furfural                        | 1514.8          | 1998-1-1   | RI, MS                   | -                       | -                       | 0.11±0.16               | 0.07±0.05               | -                       | 0.06±0.04               | -                       | -                       | 0.00±0.00               |
| Methoxy acetaldehyde            | 2909.8          | 10312-83-1 | RI                       | 0.01±0.01               | -                       | -                       | -                       | -                       | 0.22±0.16               | -                       | -                       | -                       |
| Trans-2-heptanaldehyde          | 1412.9          | 18829-55-5 | RI, MS                   | -                       | 0.12±0.12               | -                       | -                       | -                       | -                       | -                       | -                       | -                       |
| 2-Undecylenic aldehyde          | 1759.8          | 2463-77-6  | RI, MS                   | -                       | 0.02±0.02               | -                       | -                       | -                       | -                       | -                       | -                       | -                       |
| 5-Hexenal                       | 1879            | 764-59-0   | RI                       | -                       | -                       | 0.01±0.00               | -                       | -                       | -                       | -                       | -                       | -                       |

|                              |        |            |        |   |   |                        |                        |                        |                        |                        |                        |                        |
|------------------------------|--------|------------|--------|---|---|------------------------|------------------------|------------------------|------------------------|------------------------|------------------------|------------------------|
| Cis-2-heptanal               | 1380.7 | 57266-86-1 | RI, MS | - | - | 0.97±0.40 <sup>a</sup> | 0.17±0.13 <sup>b</sup> | -                      | -                      | -                      | 0.06±0.01 <sup>b</sup> | 0.29±0.16 <sup>b</sup> |
| Trans-2-nonenal              | 1556.1 | 18829-56-6 | RI, MS | - | - | 0.13±0.11              | -                      | -                      | 0.04±0.05              | -                      | -                      | 0.03±0.01              |
| Decanal                      | 1530.7 | 112-31-2   | RI, MS | - | - | -                      | 0.03±0.03 <sup>b</sup> | 0.06±0.05 <sup>b</sup> | 0.33±0.19 <sup>a</sup> | 0.06±0.06 <sup>b</sup> | 0.01±0.01 <sup>b</sup> | -                      |
| Heptanal                     | 1161   | 111-71-7   | RI, MS | - | - | -                      | 1.30±1.71              | 0.30±0.39              | -                      | 0.11±0.06              | 0.05±0.01              | 0.09±0.03              |
| 2,4-Decendialdehyde          | 1765.2 | 2363-88-4  | RI, MS | - | - | -                      | 0.13±0.15              | -                      | 0.20±0.12              | 0.14±0.06              | -                      | -                      |
| Trans-2-undecylenic aldehyde | 1716.7 | 2463-77-6  | RI, MS | - | - | -                      | 0.07±0.07              | -                      | 0.09±0.05              | -                      | -                      | 0.01±0.01              |
| 3-Hydroxybutyraldehyde       | 1156.5 | 107-89-1   | RI     | - | - | -                      | 0.03±0.05              | -                      | -                      | -                      | -                      | -                      |
| 2-Methyl-glutaraldehyde      | 1266.3 | 123-15-9   | RI     | - | - | -                      | 0.00±0.00              | -                      | -                      | -                      | -                      | -                      |
| 4-Ethylbenzaldehyde          | 1699   | 4748-78-1  | RI, MS | - | - | -                      | 0.03±0.01              | -                      | -                      | -                      | -                      | -                      |
| Trans-2,4-decendialdehyde    | 1716.9 | 25152-84-5 | RI, MS | - | - | -                      | 0.04±0.04              | -                      | -                      | 0.07±0.04              | 0.06±0.02              | 0.05±0.05              |
| 2,3-Dimethyl-glutaraldehyde  | 820.8  | 32749-94-3 | RI, MS | - | - | -                      | -                      | 0.57±0.81              | -                      | -                      | -                      | -                      |
| 2-Butyraldehyde              | 1058.4 | 1119-19-3  | RI     | - | - | -                      | -                      | 0.00±0.00              | -                      | -                      | -                      | 0.02±0.02              |
| 3,4-Glutaraldehyde           | 1063.6 | 4009-55-6  | RI     | - | - | -                      | -                      | 0.00±0.00              | -                      | -                      | -                      | -                      |
| 2-Nonenal                    | 1554.6 | 2463-53-8  | RI, MS | - | - | -                      | -                      | 0.06±0.05              | -                      | 0.03±0.01              | 0.01±0.01              | -                      |
| 2-Methyl-2-butyraldehyde     | 1317.5 | 1115-11-3  | RI, MS | - | - | -                      | -                      | -                      | 0.00±0.00              | 0.02±0.01              | -                      | -                      |
| 5-Methyl furfural            | 1638.3 | 620-02-0   | RI, MS | - | - | -                      | -                      | -                      | 0.05±0.06              | -                      | -                      | -                      |
| Undecylaldehyde              | 1662.7 | 112-44-7   | RI, MS | - | - | -                      | -                      | -                      | 0.05±0.06              | -                      | -                      | -                      |
| 3-Methyl-benzaldehyde        | 1679.4 | 620-23-5   | RI, MS | - | - | -                      | -                      | -                      | 0.01±0.01              | -                      | -                      | -                      |
| Methylal                     | 2060.6 | 109-87-5   | RI     | - | - | -                      | -                      | -                      | 0.04±0.05              | -                      | -                      | -                      |
| 5-Hydroxymethylfurfural      | 2544.1 | 67-47-0    | RI     | - | - | -                      | -                      | -                      | 0.23±0.09              | -                      | -                      | -                      |
| Glutaraldehyde               | 1004.2 | 110-62-3   | RI, MS | - | - | -                      | -                      | -                      | -                      | 0.48±0.27              | 0.28±0.09              | 0.37±0.13              |
| 2-Hexenal                    | 1184.6 | 505-57-7   | RI, MS | - | - | -                      | -                      | -                      | -                      | 0.00±0.00              | 0.00±0.00              | 0.00±0.00              |
| 3-Methyl-2-butyraldehyde     | 1167.4 | 107-86-8   | RI, MS | - | - | -                      | -                      | -                      | -                      | 0.03±0.02              | 0.02±0.01              | 0.04±0.03              |

|                             |        |            |        |                        |                         |                         |                        |                         |                         |                         |                         |                        |           |
|-----------------------------|--------|------------|--------|------------------------|-------------------------|-------------------------|------------------------|-------------------------|-------------------------|-------------------------|-------------------------|------------------------|-----------|
| 2-Hydroxybenzaldehyde       | 1605.7 | 1990-2-8   | RI, MS | -                      | -                       | -                       | -                      | -                       | -                       | -                       | 0.04±0.02               | 0.02±0.01              | -         |
| 2,6-Dimethyl-5-heptanal     | 1030.7 | 106-72-9   | RI, MS | -                      | -                       | -                       | -                      | -                       | -                       | -                       | 0.01±0.01               | -                      | 0.00±0.00 |
| 2-Methyl-2-pentenal         | 1056.7 | 623-36-9   | RI, MS | -                      | -                       | -                       | -                      | -                       | -                       | -                       | 0.00±0.00               | -                      | -         |
| Tetradecane aldehyde        | 1847.4 | 124-25-4   | RI, MS | -                      | -                       | -                       | -                      | -                       | -                       | -                       | 0.00±0.00               | -                      | -         |
| 4-Methoxybenzaldehyde       | 1940.3 | 123-11-5   | RI, MS | -                      | -                       | -                       | -                      | -                       | -                       | -                       | -                       | 0.01±0.01              | -         |
| Trans-2,6-nondialdehyde     | 1258   | 17587-33-6 | RI, MS | -                      | -                       | -                       | -                      | -                       | -                       | -                       | -                       | -                      | 0.00±0.00 |
| Trans-2,4-heptadienaldehyde | 1517   | 4313-3-5   | RI, MS | -                      | -                       | -                       | -                      | -                       | -                       | -                       | -                       | -                      | 0.01±0.01 |
| <i>Ketones</i>              |        |            |        |                        |                         |                         |                        |                         |                         |                         |                         |                        |           |
| Acetone                     | 600.2  | 67-64-1    | RI, MS | 6.37±5.55 <sup>a</sup> | 6.11±0.33 <sup>ab</sup> | 5.64±2.68 <sup>ab</sup> | 1.68±0.82 <sup>c</sup> | 2.19±1.50 <sup>bc</sup> | 1.07±0.12 <sup>c</sup>  | 0.91±0.30 <sup>c</sup>  | 0.78±0.25 <sup>c</sup>  | 0.49±0.47 <sup>c</sup> |           |
| 2-Butanone                  | 710.8  | 78-93-3    | RI, MS | 4.09±0.56 <sup>a</sup> | 2.39±0.54 <sup>b</sup>  | 2.62±0.44 <sup>b</sup>  | 0.76±0.39 <sup>c</sup> | -                       | 1.38±0.97 <sup>bc</sup> | -                       | -                       | -                      |           |
| 3-Undecanone                | 1578.1 | 2216-87-7  | RI     | 0.01±0.01              | 0.02±0.00               | -                       | -                      | -                       | -                       | -                       | -                       | -                      |           |
| 3-Nonone                    | 1478.2 | 925-78-0   | RI, MS | -                      | 1.22±0.20               | -                       | -                      | -                       | -                       | -                       | -                       | -                      |           |
| 2,3-Octadione               | 1416.8 | 585-25-1   | RI, MS | -                      | 1.22±0.20 <sup>a</sup>  | -                       | -                      | -                       | 0.06±0.06 <sup>b</sup>  | -                       | 0.06±0.02 <sup>b</sup>  | -                      |           |
| 2,3-Pentanedione            | 1552.4 | 600-14-6   | RI, MS | -                      | -                       | 0.00±0.00 <sup>b</sup>  | -                      | -                       | -                       | 0.02±0.02 <sup>ab</sup> | 0.02±0.01 <sup>ab</sup> | 0.04±0.02 <sup>a</sup> |           |
| 6-Methyl-5-heptene-2-one    | 1425.4 | 110-93-0   | RI, MS | -                      | 1.57±0.43               | -                       | -                      | -                       | -                       | -                       | -                       | -                      |           |
| 2-Pentadecanone             | 1990.5 | 2345-28-0  | RI, MS | -                      | -                       | -                       | 0.23±0.03              | 0.17±0.03               | -                       | -                       | -                       | -                      |           |
| 2-Heptanenone               | 2194.7 | 2922-51-2  | RI, MS | -                      | -                       | -                       | 0.04±0.03              | 0.07±0.04               | -                       | -                       | -                       | -                      |           |
| 2-Octanone                  | 1518.9 | 111-13-7   | RI, MS | -                      | -                       | -                       | 0.04±0.01              | -                       | 0.02±0.03               | -                       | -                       | -                      |           |
| 3-Pentanone                 | 873.2  | 96-22-0    | RI, MS | -                      | -                       | -                       | 0.30±0.40              | -                       | -                       | -                       | -                       | -                      |           |
| 2,5-Hexanedione             | 1359.3 | 110-13-4   | RI, MS | -                      | -                       | -                       | 0.04±0.04              | -                       | -                       | -                       | -                       | -                      |           |
| Amyl ketone                 | 1968.9 | 942-92-7   | RI     | -                      | -                       | -                       | 0.06±0.00              | -                       | -                       | -                       | -                       | -                      |           |
| 4-Methyl-2-heptanone        | 620.6  | 6137-06-0  | RI, MS | -                      | -                       | -                       | -                      | 0.01±0.02               | -                       | -                       | -                       | -                      |           |
| 2,3-Butanedione             | 894.4  | 431-03-8   | RI, MS | -                      | -                       | -                       | -                      | 0.16±0.22               | -                       | -                       | -                       | -                      |           |

[illegible]

|                          |        |            |        |                        |                         |                         |                        |                        |                         |                         |                         |                        |
|--------------------------|--------|------------|--------|------------------------|-------------------------|-------------------------|------------------------|------------------------|-------------------------|-------------------------|-------------------------|------------------------|
| 4,6-Dimethyl-2-heptanone | 1106.4 | 19549-80-5 | RI     | -                      | -                       | -                       | -                      | -                      | -                       | -                       | -                       | 0.00±0.01              |
| <i>Alcohols</i>          |        |            |        |                        |                         |                         |                        |                        |                         |                         |                         |                        |
| N-octanol                | 1574.3 | 111-87-5   | RI, MS | 0.45±0.24 <sup>a</sup> | 0.55±0.24 <sup>a</sup>  | 0.64±0.09 <sup>a</sup>  | 0.04±0.74 <sup>b</sup> | -                      | -                       | 0.33±0.31 <sup>ab</sup> | -                       | -                      |
| Benzyl alcohol           | 1849.9 | 100-51-6   | RI, MS | 0.06±0.05 <sup>d</sup> | 0.09±0.01 <sup>d</sup>  | 0.11±0.03 <sup>cd</sup> | -                      | 0.04±0.03 <sup>d</sup> | 0.04±0.01 <sup>d</sup>  | 0.22±0.08 <sup>ab</sup> | 0.19±0.04 <sup>bc</sup> | 0.31±0.09 <sup>a</sup> |
| Phenylethanol            | 1884.4 | 1960-12-8  | RI, MS | 0.31±0.10 <sup>c</sup> | 0.59±0.42 <sup>bc</sup> | 0.95±0.43 <sup>bc</sup> | -                      | 0.08±0.02 <sup>c</sup> | 0.03±0.02 <sup>c</sup>  | 1.87±1.56 <sup>ab</sup> | 0.95±0.29 <sup>bc</sup> | 2.99±1.04 <sup>a</sup> |
| 2-Ethyl-1-hexanol        | 1541.1 | 104-76-7   | RI, MS | 0.08±0.01 <sup>a</sup> | 0.04±0.04 <sup>b</sup>  | 0.03±0.01 <sup>b</sup>  | -                      | -                      | -                       | 0.03±0.02 <sup>b</sup>  | 0.02±0.02 <sup>b</sup>  | 0.02±0.01 <sup>b</sup> |
| 2-Ethyl-1-decanol        | 1845.4 | 21078-65-9 | RI, MS | 0.02±0.02              | 0.02±0.01               | 0.02±0.01               | -                      | -                      | -                       | -                       | -                       | -                      |
| Furfuryl alcohol         | 1668.4 | 98-00-0    | RI, MS | -                      | 0.05±0.04               | 0.04±0.01               | 0.13±0.15              | 0.24±0.07              | -                       | -                       | -                       | -                      |
| Ethanol                  | 781.2  | 64-17-5    | RI, MS | 3.34±1.01              | 4.26±2.86               | -                       | 1.88±0.64              | -                      | 3.9±3.22                | -                       | -                       | -                      |
| 2-Butanol                | 2821.5 | 78-92-2    | RI     | 0.03±0.04              | 0.54±0.86               | -                       | -                      | 0.13±0.19              | -                       | 0.00±0.00               | 0.03±0.01               | 0.09±0.05              |
| Trans-2-octene-1-ol      | 1600.2 | 18409-17-1 | RI, MS | 0.85±0.69              | 2.27±0.03               | -                       | -                      | -                      | -                       | -                       | -                       | -                      |
| Hexanol                  | 1443.7 | 111-27-3   | RI, MS | 0.58±0.62              | -                       | 0.24±0.06               | 0.05±0.06              | 0.12±0.02              | 0.04±0.05               | 0.10±0.15               | 0.06±0.02               | 0.06±0.02              |
| 1-Octene-3-ol            | 1520.9 | 3391-86-4  | RI, MS | -                      | 4.47±0.60 <sup>a</sup>  | 3.67±0.11 <sup>b</sup>  | -                      | 0.23±0.05 <sup>c</sup> | 0.39±0.48 <sup>c</sup>  | 0.61±0.49 <sup>c</sup>  | 0.37±0.06 <sup>c</sup>  | 0.59±0.18 <sup>c</sup> |
| 3-Methylthiopropanol     | 1693.5 | 505-10-2   | RI, MS | -                      | 0.06±0.04               | 0.08±0.02               | -                      | -                      | -                       | -                       | -                       | -                      |
| 5-Nonanol                | 1742   | 623-93-8   | RI     | -                      | -                       | 0.02±0.00               | -                      | -                      | -                       | -                       | -                       | -                      |
| 2-Methoxy-ethanol        | 786.7  | 109-86-4   | RI, MS | -                      | -                       | 0.02±0.02               | -                      | -                      | 0.01±0.01               | -                       | -                       | -                      |
| 2-Methyl-3-pentanol      | 1084.4 | 565-67-3   | RI     | -                      | -                       | 0.29±0.26               | -                      | -                      | -                       | 0.07±0.04               | -                       | 0.02±0.02              |
| 1-Pentene-3-ol           | 1158.6 | 616-25-1   | RI, MS | -                      | -                       | 0.36±0.08 <sup>a</sup>  | -                      | -                      | -                       | 0.22±0.07 <sup>b</sup>  | 0.13±0.03 <sup>b</sup>  | 0.19±0.05 <sup>b</sup> |
| 1-Dodecanol              | 1936.5 | 112-53-8   | RI, MS | -                      | -                       | -                       | 0.03±0.02              | 0.08±0.03              | 0.12±0.04               | 0.02±0.02               | 0.08±0.12               | -                      |
| 2,3-Butanediol           | 1577.3 | 513-85-9   | RI, MS | -                      | -                       | -                       | 1.69±0.58              | 1.21±0.87              | 0.04±0.04               | -                       | 2.42±2.68               | -                      |
| N-pentanol               | 1328.4 | 71-41-0    | RI, MS | -                      | -                       | -                       | 0.09±0.13 <sup>c</sup> | 0.41±0.05 <sup>a</sup> | 0.26±0.24 <sup>ab</sup> | 0.16±0.13 <sup>ab</sup> | 0.06±0.02 <sup>c</sup>  | 0.09±0.03 <sup>c</sup> |
| 3-Methyl-1-butanol       | 1190.3 | 123-51-3   | RI, MS | -                      | -                       | -                       | -                      | 0.32±0.29              | 0.41±0.58               | 0.25±0.20               | 0.10±0.06               | 0.19±0.06              |
| Isopropanol              | 740.4  | 67-63-0    | RI, MS | -                      | -                       | -                       | 0.10±0.12              | -                      | 0.06±0.06               | -                       | -                       | -                      |

|                                 |        |            |        |   |   |   |           |           |           |                        |                        |                        |
|---------------------------------|--------|------------|--------|---|---|---|-----------|-----------|-----------|------------------------|------------------------|------------------------|
| 1-Butanol                       | 556    | 71-36-3    | RI, MS | - | - | - | 0.24±0.33 | -         | 0.16±0.23 | 0.11±0.08              | 0.03±0.04              | 0.07±0.04              |
| 1-Heptanol                      | 1517.5 | 111-70-6   | RI, MS | - | - | - | 0.11±0.11 | -         | -         | -                      | 0.02±0.02              | -                      |
| 2,2'-Oxydiethanol               | 1931.3 | 111-46-6   | RI, MS | - | - | - | 0.05±0.03 | -         | -         | -                      | -                      | -                      |
| 1,4-Butanediol                  | 784.9  | 110-63-4   | RI     | - | - | - | -         | 0.08±0.11 | -         | -                      | -                      | -                      |
| 2-Ethyl-1-butanol               | 1029.3 | 97-95-0    | RI, MS | - | - | - | -         | 0.02±0.02 | -         | -                      | -                      | -                      |
| 1-Methoxy-2-propanol            | 1057.7 | 107-98-2   | RI, MS | - | - | - | -         | 0.07±0.05 | -         | 0.06±0.04              | 0.10±0.03              | 0.12±0.07              |
| 2-Methyl-1-propanol             | 1086.3 | 78-83-1    | RI, MS | - | - | - | -         | 0.15±0.21 | -         | 0.07±0.06              | 0.09±0.06              | 0.15±0.02              |
| N-propanol                      | 1094.6 | 71-23-8    | RI, MS | - | - | - | -         | -         | 0.02±0.02 | -                      | -                      | -                      |
| 3-Butene-2-ol                   | 1292   | 598-32-3   | RI     | - | - | - | -         | -         | 0.01±0.01 | -                      | -                      | -                      |
| 2-Ethoxy-ethanol                | 1423.2 | 110-80-5   | RI, MS | - | - | - | -         | -         | 0.01±0.01 | -                      | -                      | -                      |
| 2-Methyl-3-hexanol              | 1427.6 | 617-29-8   | RI     | - | - | - | -         | -         | 0.03±0.04 | -                      | -                      | -                      |
| 4-Octanol                       | 1524.3 | 589-62-8   | RI     | - | - | - | -         | -         | 0.00±0.01 | -                      | -                      | -                      |
| 1-Nonanol                       | 1733   | 143-08-8   | RI, MS | - | - | - | -         | -         | 0.02±0.02 | -                      | -                      | -                      |
| 2-Furan methanol                | 1733.4 | 98-00-0    | RI, MS | - | - | - | -         | -         | 0.06±0.06 | -                      | -                      | -                      |
| 3-(Methylthio)-1-propanol       | 1793.1 | 505-10-2   | RI, MS | - | - | - | -         | -         | 0.01±0.01 | -                      | -                      | 0.25±0.05              |
| 2-(2-Hydroxypropoxy)-1-propanol | 1974.7 | 106-62-7   | RI, MS | - | - | - | -         | -         | 0.03±0.03 | -                      | -                      | -                      |
| 4-Heptanol                      | 1978.3 | 589-55-9   | RI, MS | - | - | - | -         | -         | 0.03±0.02 | -                      | -                      | -                      |
| 2-Methylbenzyl alcohol          | 2075.6 | 89-95-2    | RI     | - | - | - | -         | -         | 0.01±0.01 | -                      | -                      | -                      |
| N-decanol                       | 2259.4 | 112-30-1   | RI, MS | - | - | - | -         | -         | 0.01±0.01 | -                      | -                      | -                      |
| Hexadecanol                     | 2446.8 | 36653-82-4 | RI, MS | - | - | - | -         | -         | 0.08±0.03 | -                      | 0.10±0.14              | -                      |
| 2-Pentanol                      | 2702.1 | 6032-29-7  | RI, MS | - | - | - | -         | -         | 0.02±0.02 | -                      | -                      | 0.06±0.06              |
| 3-Pentene-2-ol                  | 1146.7 | 1569-50-2  | RI, MS | - | - | - | -         | -         | -         | 0.12±0.06 <sup>a</sup> | 0.04±0.03 <sup>b</sup> | 0.02±0.02 <sup>b</sup> |
| 2,2'-Oxybis ethanol             | 1895.2 | 111-46-6   | RI, MS | - | - | - | -         | -         | -         | 0.01±0.01              | 0.01±0.01              | 0.05±0.05              |

|                         |        |          |        |                          |                          |                          |                            |                          |                           |                           |                          |                           |
|-------------------------|--------|----------|--------|--------------------------|--------------------------|--------------------------|----------------------------|--------------------------|---------------------------|---------------------------|--------------------------|---------------------------|
| 2-Methyl-3-butene-2-ol  | 1043.1 | 115-18-4 | RI, MS | -                        | -                        | -                        | -                          | -                        | -                         | 0.20±0.08                 | 0.10±0.03                | 0.44±0.33                 |
| 3-Methyl-3-butene-1-ol  | 1226   | 763-32-6 | RI, MS | -                        | -                        | -                        | -                          | -                        | -                         | 0.01±0.00                 | 0.02±0.01                | -                         |
| 2-Methyl-2-propanol     | 1210.7 | 75-65-0  | RI, MS | -                        | -                        | -                        | -                          | -                        | -                         | 0.01±0.01                 | -                        | -                         |
| 3-Pentanol              | 1535.9 | 584-02-1 | RI, MS | -                        | -                        | -                        | -                          | -                        | -                         | 0.00±0.01                 | -                        | -                         |
| Octadecyl alcohol       | 2614.2 | 112-92-5 | RI, MS | -                        | -                        | -                        | -                          | -                        | -                         | 0.01±0.02                 | -                        | -                         |
| Cis-3-hexenol           | 1430.4 | 928-96-1 | RI, MS | -                        | -                        | -                        | -                          | -                        | -                         | -                         | 0.02±0.03                | -                         |
| 3-Octanol               | 2469.9 | 589-98-0 | RI, MS | -                        | -                        | -                        | -                          | -                        | -                         | -                         | -                        | 0.15±0.06                 |
| 2-Methyl-1-pentene-3-ol | 2041.8 | 2088-7-5 | RI, MS | -                        | -                        | -                        | -                          | -                        | -                         | -                         | -                        | 2.45±0.85                 |
| <i>Acids</i>            |        |          |        |                          |                          |                          |                            |                          |                           |                           |                          |                           |
| Acetic acid             | 1518.2 | 64-19-7  | RI, MS | 4.85±1.29 <sup>c</sup>   | 4.02±0.99 <sup>c</sup>   | 9.33±2.90 <sup>bc</sup>  | 19.18±13.77 <sup>abc</sup> | 29.51±4.20 <sup>a</sup>  | 25.08±11.85 <sup>ab</sup> | 4.52±3.14 <sup>c</sup>    | 9.27±2.91 <sup>bc</sup>  | 12.15±10.56 <sup>bc</sup> |
| Butyrate                | 1608   | 107-92-6 | RI, MS | 2.76±0.80 <sup>cd</sup>  | 1.31±0.20 <sup>cd</sup>  | 1.61±1.53 <sup>cd</sup>  | 5.96±1.42 <sup>bc</sup>    | 0.77±0.26 <sup>d</sup>   | 3.52±1.93 <sup>cd</sup>   | 11.69±4.08 <sup>a</sup>   | 5.04±0.58 <sup>bcd</sup> | 8.45±4.93 <sup>ab</sup>   |
| Caproic acid            | 1823.1 | 142-62-1 | RI, MS | 6.11±0.93 <sup>b</sup>   | 2.65±0.73 <sup>c</sup>   | 3.19±0.61 <sup>c</sup>   | 3.04±0.69 <sup>c</sup>     | 0.95±0.28 <sup>c</sup>   | 0.50±0.15 <sup>c</sup>    | -                         | 12.25±2.07 <sup>a</sup>  | 11.4±3.04 <sup>a</sup>    |
| Octanoic acid           | 2036.1 | 124-07-2 | RI, MS | 0.76±0.07 <sup>b</sup>   | 0.10±0.02 <sup>b</sup>   | 0.09±0.01 <sup>b</sup>   | 0.87±0.05 <sup>b</sup>     | 0.83±0.27 <sup>b</sup>   | 0.28±0.00 <sup>b</sup>    | 8.31±2.49 <sup>a</sup>    | 7.60±1.68 <sup>a</sup>   | 7.04±2.58 <sup>a</sup>    |
| Decanoic acid           | 2240.1 | 334-48-5 | RI, MS | 0.12±0.07 <sup>c</sup>   | 0.07±0.02 <sup>c</sup>   | 0.26±0.10 <sup>c</sup>   | 1.21±0.44 <sup>bc</sup>    | 2.10±0.15 <sup>abc</sup> | 0.38±0.27 <sup>c</sup>    | 3.32±2.97 <sup>ab</sup>   | 4.03±1.22 <sup>a</sup>   | 3.77±1.42 <sup>a</sup>    |
| 2-Methylpropionic acid  | 1575.4 | 79-31-2  | RI, MS | 3.98±0.97 <sup>abc</sup> | 5.03±1.46 <sup>abc</sup> | 5.41±1.19 <sup>abc</sup> | 12.60±1.13 <sup>a</sup>    | 1.25±0.35 <sup>c</sup>   | 3.59±1.98 <sup>bc</sup>   | 10.97±10.66 <sup>ab</sup> | -                        | 7.20±6.56 <sup>abc</sup>  |
| 3-Methylbutanoic acid   | 1649.5 | 503-74-2 | RI, MS | 10.14±2.16 <sup>a</sup>  | 11.90±5.29 <sup>a</sup>  | 10.02±0.96 <sup>a</sup>  | -                          | 1.73±0.56 <sup>b</sup>   | 3.59±1.97 <sup>b</sup>    | 0.02±0.01 <sup>b</sup>    | -                        | -                         |
| Propionic acid          | 1561.6 | 1979-9-4 | RI, MS | 0.07±0.12                | 0.99±1.58                | -                        | 1.20±0.43                  | 0.16±0.03                | 0.76±0.23                 | 0.40±0.17                 | -                        | -                         |
| Phenylacetic acid       | 2472.8 | 103-82-2 | RI, MS | -                        | 0.01±0.00 <sup>b</sup>   | 0.05±0.02 <sup>b</sup>   | 0.80±0.35 <sup>a</sup>     | 0.47±0.33 <sup>ab</sup>  | -                         | -                         | -                        | -                         |
| 4-Methylvaleric acid    | 1781.2 | 646-07-1 | RI, MS | -                        | 0.03±0.01 <sup>ab</sup>  | 0.03±0.01 <sup>ab</sup>  | -                          | 0.05±0.01 <sup>ab</sup>  | -                         | 0.05±0.03 <sup>ab</sup>   | 0.03±0.01 <sup>b</sup>   | 0.07±0.03 <sup>a</sup>    |
| Heptanic acid           | 1929.9 | 111-14-8 | RI, MS | 0.12±0.01                | -                        | -                        | 0.27±0.01                  | 0.39±0.28                | -                         | 0.52±0.43                 | -                        | -                         |
| Valeric acid            | 2140.4 | 109-52-4 | RI, MS | -                        | 0.03±0.01 <sup>c</sup>   | -                        | 0.73±0.14 <sup>c</sup>     | 0.28±0.11 <sup>a</sup>   | 0.08±0.06 <sup>b</sup>    | -                         | 0.00±0.00 <sup>c</sup>   | -                         |
| Formic acid             | 1117.6 | 64-18-6  | RI, MS | -                        | -                        | 0.03±0.03                | 0.65±0.66                  | -                        | -                         | -                         | -                        | -                         |
| Nonanoic acid           | 2045.1 | 112-05-0 | RI, MS | -                        | -                        | 0.03±0.01 <sup>c</sup>   | 0.25±0.09 <sup>b</sup>     | 0.41±0.08 <sup>a</sup>   | -                         | 0.01±0.01 <sup>c</sup>    | -                        | 0.01±0.00 <sup>c</sup>    |

|                           |        |            |        |   |   |                        |                         |                         |                        |                        |                         |                         |
|---------------------------|--------|------------|--------|---|---|------------------------|-------------------------|-------------------------|------------------------|------------------------|-------------------------|-------------------------|
| 9-Decenoic acid           | 2196.1 | 14436-32-9 | RI, MS | - | - | 0.02±0.00              | -                       | -                       | -                      |                        |                         |                         |
| Dodecanoic acid           | 2277.7 | 143-07-7   | RI, MS | - | - | 0.02±0.02 <sup>c</sup> | 1.07±0.42 <sup>b</sup>  | 2.00±0.47 <sup>a</sup>  | 0.34±0.09 <sup>c</sup> | -                      | -                       | 0.18±0.18 <sup>c</sup>  |
| 3-Methylvaleric acid      | 1718.8 | 105-43-1   | RI     | - | - | 0.01±0.00              | 0.02±0.02               | 0.03±0.02               | -                      | -                      | -                       | -                       |
| 3-Methyl-2-butenic acid   | 1595.8 | 541-47-9   | RI, MS | - | - | 0.01±0.01              | -                       | -                       | -                      | 0.02±0.01              | 0.01±0.01               | -                       |
| Oxalate                   | 1130.5 | 144-62-7   | RI     | - | - | -                      | 0.01±0.01               | 0.01±0.02               | 0.03±0.02              | -                      | -                       | -                       |
| Tridecanoic acid          | 2468.2 | 638-53-9   | RI, MS | - | - | -                      | 0.09±0.01               | 0.08±0.05               | 0.03±0.04              | -                      | -                       | -                       |
| Tetradecanoic acid        | 2580.4 | 544-63-8   | RI, MS | - | - | -                      | 7.99±2.45 <sup>b</sup>  | 15.58±3.35 <sup>a</sup> | 0.22±0.07 <sup>c</sup> | -                      | -                       | 0.05±0.09 <sup>c</sup>  |
| Pentadecanoic acid        | 2623.8 | 1002-84-2  | RI, MS | - | - | -                      | 0.06±0.02               | 0.62±0.21               | 0.58±0.51              |                        |                         |                         |
| Hexadecylic acid          | 2704   | 1957-10-3  | RI, MS | - | - | -                      | 0.55±0.19               | 0.48±0.12               | 17.27±24.18            | 0.29±0.28              | -                       | 1.63±2.81               |
| 2-Methylacrylic acid      | 1116.3 | 79-41-4    | RI     | - | - | -                      | 0.03±0.04               | 0.14±0.06               | -                      | -                      | -                       | -                       |
| 2-Acrylic acid            | 1614.3 | 1979-10-7  | RI     | - | - | -                      | 0.06±0.05               | 0.29±0.03               | -                      | -                      | -                       | -                       |
| Heptadecanoic acid        | 2818.8 | 506-12-7   | RI, MS | - | - | -                      | 0.59±0.37               | 1.29±0.29               | -                      | -                      | -                       | -                       |
| 3-Butyric acid            | 601.2  | 2345-51-9  | RI     | - | - | -                      | -                       | 0.07±0.04               | 0.01±0.01              | -                      | -                       | -                       |
| 9-Tetraenoic acid         | 2608.4 | 544-64-9   | RI, MS | - | - | -                      | -                       | 0.54±0.27               | 0.36±0.27              | -                      | -                       | -                       |
| 2-Methyl butyric acid     | 1637.8 | 116-53-0   | RI, MS | - | - | -                      | 8.44±2.98               | -                       | -                      | -                      | 4.99±1.32               | 5.29±4.65               |
| Benzoic acid              | 2345.7 | 65-85-0    | RI, MS | - | - | -                      | 0.90±0.99               | -                       | -                      | -                      | -                       | -                       |
| Octadecanoic acid         | 2896.1 | 1957-11-4  | RI, MS | - | - | -                      | 12.75±4.57 <sup>a</sup> | -                       | -                      | 0.02±0.02 <sup>b</sup> | -                       | 0.34±0.31 <sup>b</sup>  |
| 3-Methylvaleric acid      | 1755.7 | 105-43-1   | RI     | - | - | -                      | -                       | 0.03±0.02 <sup>b</sup>  | -                      | 0.08±0.04 <sup>a</sup> | 0.04±0.01 <sup>ab</sup> | 0.07±0.02 <sup>ab</sup> |
| 3-Decenoic acid           | 2274.6 | 15469-77-9 | RI     | - | - | -                      | -                       | 0.27±0.29               | -                      | -                      | -                       | -                       |
| Undecanonic acid          | 2365.1 | 112-37-8   | RI, MS | - | - | -                      | -                       | 8.77±12.15              | -                      | -                      | -                       | -                       |
| Linoleic acid             | 2859.6 | 60-33-3    | RI, MS | - | - | -                      | -                       | 3.15±0.63               | -                      | -                      | -                       | -                       |
| 2-Ethyl-hexanoic acid     | 2042   | 149-57-5   | RI, MS | - | - | -                      | -                       | -                       | 0.07±0.01              | -                      | -                       | 0.00±0.00               |
| 2-Methyl-4-pentenoic acid | 2459.8 | 1575-74-2  | RI     | - | - | -                      | -                       | -                       | 0.26±0.12              | -                      | -                       | -                       |

|                             |        |            |        |                         |                         |                         |                        |                        |                        |                        |                        |                        |
|-----------------------------|--------|------------|--------|-------------------------|-------------------------|-------------------------|------------------------|------------------------|------------------------|------------------------|------------------------|------------------------|
| Cis-9-hexadecenoic acid     | 2899.3 | 373-49-9   | RI, MS | -                       | -                       | -                       | -                      | -                      | 12.06±5.00             | -                      | -                      | -                      |
| 2-Octenoic acid             | 2153.6 | 1470-50-4  | RI     | -                       | -                       | -                       | -                      | -                      | -                      | 0.07±0.08              | -                      | -                      |
| 2-Methyl-2-butenic acid     | 2376.2 | 13201-46-2 | RI     | -                       | -                       | -                       | -                      | -                      | -                      | 0.02±0.01              | -                      | -                      |
| 3-Butenoic acid             | 1731.2 | 625-38-7   | RI     | -                       | -                       | -                       | -                      | -                      | -                      | -                      | 0.00±0.00              | -                      |
| 4-Hexenoic acid             | 1938.7 | 35194-36-6 | RI, MS | -                       | -                       | -                       | -                      | -                      | -                      | -                      | -                      | 0.01±0.01              |
| 4-Pentenoic acid            | 1757.3 | 591-80-0   | RI     | -                       | -                       | -                       | -                      | -                      | -                      | -                      | -                      | 0.06±0.02              |
| Ethyl-9,12-octadienoic acid | 2454.9 | 7619-8-1   | RI, MS | -                       | -                       | -                       | -                      | 0.77±0.21              | -                      | -                      | -                      | -                      |
| <i>Esters</i>               |        |            |        |                         |                         |                         |                        |                        |                        |                        |                        |                        |
| Methyl hexanoate            | 1174.7 | 106-70-7   | RI, MS | 2.75±2.10 <sup>a</sup>  | 1.11±1.44 <sup>ab</sup> | 1.12±0.83 <sup>ab</sup> | -                      | -                      | -                      | -                      | -                      | -                      |
| Ethyl hexanoate             | 1246.2 | 123-66-0   | RI, MS | 0.50±0.56 <sup>a</sup>  | 0.21±0.14 <sup>ab</sup> | 0.16±0.03 <sup>ab</sup> | -                      | -                      | 0.00±0.00 <sup>b</sup> | 0.00±0.00 <sup>b</sup> | 0.02±0.01 <sup>b</sup> | 0.01±0.00 <sup>b</sup> |
| Methyl octanoate            | 1479.9 | 111-11-5   | RI, MS | 0.73±0.45               | 0.42±0.46               | 0.55±0.29               | -                      | -                      | -                      | -                      | -                      | -                      |
| Ethyl caproate              | 1513.7 | 106-32-1   | RI, MS | 0.15±0.09               | 0.11±0.06               | 0.11±0.03               | -                      | -                      | -                      | 0.02±0.01              | 0.05±0.02              | 0.24±0.33              |
| Methyl decanoate            | 1592.7 | 110-42-9   | RI, MS | 0.09±0.04 <sup>ab</sup> | 0.11±0.10 <sup>a</sup>  | 0.13±0.01 <sup>a</sup>  | -                      | -                      | -                      | -                      | -                      | 0.01±0.00 <sup>b</sup> |
| Ethyl decanoate             | 1629.8 | 110-38-3   | RI, MS | 0.03±0.02 <sup>b</sup>  | 0.06±0.03 <sup>b</sup>  | 0.11±0.06 <sup>a</sup>  | -                      | 0.01±0.01 <sup>b</sup> | -                      | 0.01±0.00 <sup>b</sup> | 0.01±0.01 <sup>b</sup> | 0.01±0.00 <sup>b</sup> |
| Dehydropropionolactone      | 1990.4 | 2381-87-5  | RI, MS | 0.02±0.01 <sup>c</sup>  | 0.02±0.01 <sup>c</sup>  | 0.09±0.02 <sup>bc</sup> | 0.05±0.03 <sup>c</sup> | -                      | 0.01±0.01 <sup>c</sup> | 0.57±0.50 <sup>b</sup> | 0.58±0.20 <sup>b</sup> | 1.51±0.55 <sup>a</sup> |
| Methyl isovalerate          | 1010.9 | 556-24-1   | RI, MS | 2.59±1.59               | 1.54±0.79               | 1.53±1.52               | -                      | -                      | -                      | -                      | -                      | -                      |
| Methyl phenylacetate        | 1737   | 101-41-7   | RI     | 0.07±0.04               | 0.05±0.03               | 0.18±0.18               | -                      | -                      | -                      | -                      | -                      | -                      |
| Panthenolide                | 2000   | 599-04-2   | RI, MS | -                       | 0.35±0.06 <sup>b</sup>  | 2.16±0.56 <sup>a</sup>  | -                      | 0.17±0.03 <sup>b</sup> | -                      | -                      | -                      | -                      |
| Methyl butyrate             | 924    | 623-42-7   | RI, MS | 0.64±0.26               | -                       | 0.59±0.75               | -                      | -                      | -                      | -                      | -                      | -                      |
| Ethyl phenylpropionate      | 1862.3 | 2021-28-5  | RI, MS | 0.03±0.01               | 0.01±0.00               | -                       | -                      | -                      | -                      | -                      | -                      | -                      |
| Ethyl acetate               | 686.1  | 141-78-6   | RI, MS | -                       | 0.67±0.22               | 0.59±0.18               | -                      | -                      | -                      | -                      | -                      | -                      |
| Ethyl phenylacetate         | 1764.2 | 101-97-3   | RI, MS | -                       | 0.02±0.00               | 0.03±0.01               | -                      | -                      | -                      | -                      | 0.03±0.01              | 0.04±0.01              |
| Ethyl dodecanoate           | 1835   | 106-33-2   | RI, MS | -                       | 0.00±0.00               | 0.01±0.00               | -                      | -                      | -                      | -                      | -                      | 0.07±0.06              |

|                           |        |            |        |   |                        |                        |                         |                        |                         |                        |                         |                        |
|---------------------------|--------|------------|--------|---|------------------------|------------------------|-------------------------|------------------------|-------------------------|------------------------|-------------------------|------------------------|
| Propyl acetate            | 890    | 109-60-4   | RI, MS |   | 5.93±2.28 <sup>a</sup> | -                      | -                       | 0.01±0.02 <sup>b</sup> | 0.26±0.21 <sup>b</sup>  | —                      | 0.56±0.23 <sup>b</sup>  | 0.44±0.25 <sup>b</sup> |
| Methyl-2-methylbutyrate   | 1002.2 | 868-57-5   | RI     | - | 0.45±0.25              | -                      | -                       | -                      | -                       | -                      | -                       | -                      |
| Butyl acetate             | 1060.6 | 123-86-4   | RI, MS | - | 0.59±0.13 <sup>a</sup> | -                      | -                       | -                      | -                       | 0.02±0.01 <sup>b</sup> | 0.04±0.01 <sup>b</sup>  | 0.04±0.02 <sup>b</sup> |
| Methyl nonanoate          | 1542.2 | 1731-84-6  | RI, MS | - | 0.01±0.01              | -                      | -                       | -                      | -                       | -                      | -                       | -                      |
| Ethyl-2-hydroxypropionate | 2629.5 | 97-64-3    | RI     | - | 0.00±0.00              | -                      | -                       | 0.00±0.00              | 0.02±0.02               | -                      | -                       | -                      |
| Butyrolactone             | 1584.3 | 96-48-0    | RI, MS | - | -                      | 3.63±0.87 <sup>b</sup> | -                       | 0.67±0.49 <sup>b</sup> | 2.06±1.14 <sup>b</sup>  | -                      | 7.83±3.63 <sup>a</sup>  | -                      |
| Methyl valerate           | 1071.5 | 624-24-8   | RI, MS | - | -                      | 0.05±0.02              | -                       | -                      | -                       | -                      | -                       | -                      |
| Isobutyl acetate          | 1058.7 | 110-19-0   | RI, MS | - | -                      | 0.31±0.11 <sup>a</sup> | 0.02±0.02 <sup>b</sup>  | 0.02±0.03 <sup>b</sup> | -                       | -                      | -                       | -                      |
| Methyl-2-methylbutyrate   | 1002.1 | 868-57-5   | RI     | - | -                      | 0.92±1.09              | -                       | -                      | -                       | -                      | -                       | -                      |
| 2-Hydroxy-γ-butyrolactone | 2130.3 | 19444-84-9 | RI, MS | - | -                      | 0.00±0.00              | -                       | 0.08±0.01              | -                       | -                      | -                       | -                      |
| Ethyl tetradecanoate      | 2021.3 | 124-06-1   | RI, MS | - | -                      | -                      | 0.02±0.02               | 0.05±0.01              | 0.03±0.03               | -                      | -                       | -                      |
| Ethyl octadecanoate       | 2402.1 | 111-61-5   | RI, MS | - | -                      | -                      | 0.14±0.11 <sup>a</sup>  | 0.16±0.01 <sup>a</sup> | 0.02±0.02 <sup>ab</sup> | -                      | -                       | 0.00±0.00 <sup>b</sup> |
| Ethyl linoleate           | 2454.6 | 544-35-4   | RI, MS | - | -                      | -                      | 0.15±0.08               | -                      | 0.03±0.02               |                        |                         |                        |
| Methyl tetradecanoate     | 1980.2 | 124-10-7   | RI, MS | - | -                      | -                      | 0.03±0.01               | 0.02±0.00              | -                       | -                      | -                       | 0.01±0.00              |
| Methyl hexadecate         | 2181.7 | 112-39-0   | RI, MS | - | -                      | -                      | 0.23±0.06 <sup>ab</sup> | 0.26±0.09 <sup>a</sup> | -                       | 0.07±0.03 <sup>c</sup> | 0.11±0.07 <sup>bc</sup> | 0.08±0.04 <sup>c</sup> |
| Ethyl-9-hexadecanoate     | 2239.4 | 54546-22-4 | RI, MS | - | -                      | -                      | 0.05±0.04               | 0.14±0.10              | -                       | -                      | -                       | -                      |
| Methyl formate            | 2924   | 107-31-3   | RI     | - | -                      | -                      | -                       | 0.65±0.47              | 0.01±0.01               | -                      | -                       | -                      |
| Ethyl palmitate           | 2218.6 | 628-97-7   | RI, MS | - | -                      | -                      | -                       | 0.30±0.22 <sup>a</sup> | 0.06±0.04 <sup>b</sup>  | 0.01±0.00 <sup>b</sup> | 0.02±0.03 <sup>b</sup>  | 0.04±0.01 <sup>b</sup> |
| Methyl acetate            | 1350   | 79-20-9    | RI, MS | - | -                      | -                      | -                       | 0.15±0.11              | 0.00±0.00               | -                      | -                       | -                      |
| Ethyl butyrate            | 1062.7 | 4341-76-8  | RI     | - | -                      | -                      | -                       | 0.00±0.00              | -                       | -                      | -                       | -                      |
| Octyl hexadecate          | 2616.9 | 16958-85-3 | RI     | - | -                      | -                      | -                       | 0.17±0.14              | -                       | -                      | -                       | -                      |
| Methyl oleate             | 2384.4 | 112-62-9   | RI, MS | - | -                      | -                      | -                       | 0.34±0.12              | -                       | -                      | -                       | -                      |
| Ethyl oleate              | 2416.3 | 111-62-6   | RI, MS | - | -                      | -                      | -                       | 0.51±0.14              | -                       | -                      | -                       | -                      |

|                                      |        |            |        |   |   |   |   |           |           |                        |                        |                        |
|--------------------------------------|--------|------------|--------|---|---|---|---|-----------|-----------|------------------------|------------------------|------------------------|
| Cyclopentyl-4-ethylbenzoate          | 1742.9 | 14779-78-3 | RI, MS | - | - | - | - | 4.93±3.18 | -         | -                      | -                      | -                      |
| 2-Methyl acrylate                    | 880.4  | 922-67-8   | RI     | - | - | - | - | -         | 0.01±0.01 | -                      | -                      | -                      |
| 2-Vinyl acrylate                     | 1149.4 | 2177-18-6  | RI     | - | - | - | - | -         | 0.01±0.01 | -                      | -                      | -                      |
| Vinyl formate                        | 1261.1 | 692-45-5   | RI     | - | - | - | - | -         | 0.27±0.38 | -                      | -                      | -                      |
| Butyl valerate                       | 1553.7 | 591-68-4   | RI, MS | - | - | - | - | -         | 0.00±0.00 | -                      | -                      | -                      |
| Heptyl formate                       | 1563   | 112-23-2   | RI     | - | - | - | - | -         | 0.65±0.56 | -                      | -                      | -                      |
| Butyl-2-butenolate                   | 1573.2 | 7299-91-4  | RI, MS | - | - | - | - | -         | 0.02±0.02 | -                      | -                      | -                      |
| Ethyl-dodecanoate                    | 1700.3 | 106-33-2   | RI, MS | - | - | - | - | -         | 0.00±0.00 | -                      | -                      | -                      |
| Triethyl phosphate                   | 1741.9 | 78-40-0    | RI, MS | - | - | - | - | -         | 0.02±0.01 | -                      | -                      | -                      |
| Methyl-2-hydroxy-2-methyl-propionate | 1967.4 | 2110-78-3  | RI     | - | - | - | - | -         | 0.03±0.04 | -                      | -                      | -                      |
| Isopropyl myristate                  | 2124.9 | 110-27-0   | RI, MS | - | - | - | - | -         | 0.07±0.07 | -                      | -                      | -                      |
| Diethyl-1,4-phthalate                | 2418   | 636-09-9   | RI     | - | - | - | - | -         | 0.16±0.14 | -                      | -                      | -                      |
| Diisobutyl phthalate                 | 2581.6 | 84-69-5    | RI, MS | - | - | - | - | -         | 0.02±0.02 | -                      | -                      | -                      |
| Dibutyl phthalate                    | 2706.9 | 84-74-2    | RI, MS | - | - | - | - | -         | 0.08±0.06 | -                      | -                      | 0.96±0.56              |
| Ethyl-p-hydroxybenzoate              | 2915.7 | 120-47-8   | RI, MS | - | - | - | - | -         | 0.03±0.02 | -                      | -                      | -                      |
| Decyl decanoate                      | 2429.8 | 1654-86-0  | RI, MS | - | - | - | - | -         | -         | 0.10±0.03              | 0.10±0.05              | 0.05±0.03              |
| Ethyl-2-methyl butyrate              | 1054.3 | 7452-79-1  | RI, MS | - | - | - | - | -         | -         | 0.02±0.02              | 0.03±0.03              | 0.07±0.03              |
| Ethyl-3-methyl butyrate              | 1066.6 | 108-64-5   | RI, MS | - | - | - | - | -         | -         | 0.01±0.01              | 0.01±0.00              | 0.02±0.01              |
| Dimethyl phthalate                   | 2200.6 | 131-11-3   | RI, MS | - | - | - | - | -         | -         | 0.05±0.01              | 0.04±0.02              | 0.04±0.02              |
| Diethyl phthalate                    | 2265.8 | 84-66-2    | RI, MS | - | - | - | - | -         | -         | 0.03±0.01              | 0.04±0.03              | 0.04±0.01              |
| 2-Hydroxy-γ- Butyrolactone           | 2077.7 | 19444-84-9 | RI, MS | - | - | - | - | -         | -         | 0.03±0.02 <sup>b</sup> | 0.04±0.02 <sup>b</sup> | 0.15±0.06 <sup>a</sup> |
| Butyl butyrate                       | 1188   | 109-21-7   | RI, MS | - | - | - | - | -         | -         | 0.00±0.00              | 0.00±0.00              | -                      |
| Butyl 2-butenolate                   | 1194.6 | 7299-91-4  | RI, MS | - | - | - | - | -         | -         | 0.00±0.00              | 0.00±0.00              | -                      |

|                           |        |            |        |                         |                        |                         |                         |                         |                         |                          |                          |                         |
|---------------------------|--------|------------|--------|-------------------------|------------------------|-------------------------|-------------------------|-------------------------|-------------------------|--------------------------|--------------------------|-------------------------|
| Ethyl heptanate           | 1378.1 | 106-30-9   | RI, MS | -                       | -                      | -                       | -                       | -                       | -                       | -                        | 0.00±0.00                | 0.00±0.00               |
| Dimethyl adipate          | 1745.7 | 627-93-0   | RI, MS | -                       | -                      | -                       | -                       | -                       | -                       | -                        | -                        | -                       |
| Ethyl-2-hydroxypropionate | 1389.6 | 97-64-3    | RI, MS | -                       | -                      | -                       | -                       | -                       | -                       | -                        | 0.00±0.00                | 0.00±0.00               |
| Methyl acetate            | 1198.2 | 79-20-9    | RI, MS | -                       | -                      | -                       | -                       | -                       | -                       | 0.02±0.02                | -                        | -                       |
| Ethyl-4-ethoxybenzoate    | 2082.2 | 23676-09-7 | RI, MS | -                       | -                      | -                       | -                       | -                       | -                       | 0.06±0.04                | -                        | -                       |
| Ethyl tetradecanoate      | 1972.1 | 124-06-1   | RI, MS | -                       | -                      | -                       | -                       | -                       | -                       | 0.02±0.01                | -                        | -                       |
| Ethyl propionate          | 1105.5 | 105-37-3   | RI, MS | -                       | -                      | -                       | -                       | -                       | -                       | -                        | 0.00±0.00                | -                       |
| Methyl heptanate          | 1008.7 | 106-73-0   | RI, MS | -                       | -                      | -                       | -                       | -                       | -                       | -                        | 0.00±0.00                | -                       |
| Butyl-3-methyl butyrate   | 1009.8 | 106-27-4   | RI, MS | -                       | -                      | -                       | -                       | -                       | -                       | -                        | 0.02±0.00                | -                       |
| Ethyl valerate            | 1119.3 | 539-82-2   | RI, MS | -                       | -                      | -                       | -                       | -                       | -                       | -                        | -                        | 0.00±0.00               |
| Methyl-2-butyrate         | 1018.2 | 623-43-8   | RI, MS | -                       | -                      | -                       | -                       | -                       | -                       | -                        | -                        | 0.01±0.01               |
| Butyl-2-methyl butyrate   | 1153.5 | 15706-73-7 | RI, MS | -                       | -                      | -                       | -                       | -                       | -                       | -                        | -                        | 0.00±0.00               |
| Ethyl-2-methylvalerate    | 1764.1 | 39255-32-8 | RI, MS | -                       | -                      | -                       | -                       | -                       | -                       | -                        | -                        | 0.03±0.01               |
| <i>Alkane</i>             |        |            |        |                         |                        |                         |                         |                         |                         |                          |                          |                         |
| Pentane                   | 494    | 109-66-0   | RI     | 0.04±0.04               | 0.05±0.04              | 0.09±0.01               | 0.06±0.05               | 0.18±0.26               | 0.03±0.04               | 0.05±0.01                | 0.03±0.01                | 0.03±0.00               |
| N-hexane                  | 505.2  | 110-54-3   | RI     | 0.01±0.01 <sup>b</sup>  | 0.02±0.00 <sup>b</sup> | 0.01±0.01 <sup>b</sup>  | -                       | -                       | -                       | 34.46±17.91 <sup>a</sup> | 32.53±10.52 <sup>a</sup> | 16.18±4.26 <sup>b</sup> |
| Decane                    | 999.6  | 124-18-5   | RI     | 4.25±1.05 <sup>a</sup>  | 2.52±0.73 <sup>b</sup> | 1.57±0.25 <sup>b</sup>  | -                       | 0.03±0.04 <sup>c</sup>  | 0.39±0.56 <sup>c</sup>  | -                        | -                        | 0.24±0.11 <sup>c</sup>  |
| Undecanone                | 1023.9 | 1120-21-4  | RI     | 0.10±0.04               | 0.08±0.03              | 0.02±0.02               | -                       | -                       | 0.02±0.03               | -                        | -                        | -                       |
| Dodecane                  | 1194.2 | 112-40-3   | RI     | 2.36±1.50 <sup>a</sup>  | 2.69±1.98 <sup>a</sup> | 0.24±0.04 <sup>b</sup>  | -                       | -                       | 0.01±0.01 <sup>b</sup>  | 0.11±0.05 <sup>b</sup>   | 0.18±0.05 <sup>b</sup>   | 0.04±0.02 <sup>b</sup>  |
| Tridecane                 | 1054.1 | 629-50-5   | RI     | 0.26±0.03 <sup>a</sup>  | 0.13±0.06 <sup>b</sup> | 0.13±0.06 <sup>b</sup>  | -                       | -                       | -                       | 0.02±0.01 <sup>c</sup>   | 0.02±0.01 <sup>c</sup>   | 0.02±0.01 <sup>c</sup>  |
| Tetradecane               | 1499.9 | 629-59-4   | RI     | 0.62±0.22 <sup>a</sup>  | 0.40±0.04 <sup>a</sup> | 0.44±0.17 <sup>a</sup>  | -                       | -                       | -                       | 0.02±0.01 <sup>b</sup>   | 0.13±0.03 <sup>b</sup>   | 0.17±0.12 <sup>b</sup>  |
| Cetane                    | 1599.7 | 544-76-3   | RI     | 0.04±0.04 <sup>ab</sup> | 0.01±0.01 <sup>b</sup> | 0.04±0.01 <sup>ab</sup> | 0.05±0.05 <sup>ab</sup> | 0.06±0.06 <sup>ab</sup> | 0.06±0.08 <sup>ab</sup> | 0.14±0.08 <sup>ab</sup>  | 0.17±0.11 <sup>a</sup>   | -                       |
| 3-Methylheptane           | 565.6  | 589-81-1   | RI     | 0.12±0.11               | 0.12±0.05              | 0.09±0.01               | -                       | -                       | -                       | -                        | -                        | -                       |

|                        |        |            |        |                        |                        |                        |           |           |           |   |                        |   |
|------------------------|--------|------------|--------|------------------------|------------------------|------------------------|-----------|-----------|-----------|---|------------------------|---|
| 3-Methylundecanone     | 1159.8 | 1002-43-3  | RI     | 1.35±0.79              | 1.35±1.10              | 0.08±0.02              | -         | -         | -         | - | -                      | - |
| 5-Methylnonane         | 841.8  | 15869-85-9 | RI     | 0.09±0.01 <sup>a</sup> | 0.05±0.00 <sup>b</sup> | 0.04±0.01 <sup>b</sup> | -         | -         | -         | - | -                      | - |
| 4-Methyltetradecane    | 1462   | 25117-24-2 | RI     | 0.06±0.01              | 0.05±0.02              | 0.06±0.01              | -         | -         | -         | - | -                      | - |
| 3-Methyltridecane      | 1467.8 | 6418-41-3  | RI, MS | 0.48±0.07 <sup>a</sup> | 0.21±0.07 <sup>b</sup> | 0.28±0.06 <sup>b</sup> | -         | -         | -         | - | 0.02±0.01 <sup>c</sup> | - |
| 4-Ethyloctane          | 829.5  | 15869-86-0 | RI     | 0.14±0.01              | 0.11±0.04              | -                      | -         | -         | -         | - | -                      | - |
| 3-Methylpentadecane    | 1584   | 2882-96-4  | RI     | 0.06±0.01              | 0.04±0.02              | -                      | -         | -         | -         | - | -                      | - |
| Octane                 | 585.8  | 111-65-9   | RI     | -                      | 0.31±0.08              | 0.21±0.04              | 0.47±0.36 | -         | 0.07±0.08 | - | -                      | - |
| 4-Ethyldecane          | 1134.1 | 1636-44-8  | RI     | 0.13±0.02              | -                      | -                      | -         | -         | -         | - | -                      | - |
| 2,5-Dimethyldecane     | 1050.2 | 17312-50-4 | RI     | 0.45±0.40              | -                      | -                      | -         | -         | -         | - | -                      | - |
| 5-Methylundecanone     | 1141.9 | 1632-70-8  | RI     | 0.37±0.23              | -                      | -                      | -         | -         | -         | - | -                      | - |
| 2-Methylcetane         | 1565.3 | 1560-92-5  | RI     | 0.01±0.01              | -                      | -                      | -         | -         | -         | - | -                      | - |
| 4-Ethylheptane         | 1031.1 | 2216-32-2  | RI     | -                      | 0.19±0.18              | -                      | -         | -         | -         | - | -                      | - |
| 5-Propyldecane         | 1132.5 | 17312-62-8 | RI     | -                      | 0.14±0.04              | -                      | -         | -         | -         | - | -                      | - |
| 4-Methyldodecane       | 1156.6 | 6117-97-1  | RI     | -                      | 0.09±0.10              | -                      | -         | -         | -         | - | -                      | - |
| 3-Methyloctane         | 1098.5 | 2216-33-3  | RI     | -                      | -                      | 0.22±0.21              | -         | -         | -         | - | -                      | - |
| 5-Methyldecane         | 1044.4 | 13151-35-4 | RI     | -                      | -                      | 0.30±0.07              | -         | -         | -         | - | -                      | - |
| 3,3-Dimethyloctane     | 1043.8 | 4110-44-5  | RI     | -                      | -                      | 0.08±0.02              | -         | -         | -         | - | -                      | - |
| 2,2-Dimethylbutane     | 1057   | 75-83-2    | RI, MS | -                      | -                      | 0.09±0.13              | -         | -         | -         | - | -                      | - |
| 4-Ethyltetradecane     | 1576.5 | 55045-14-2 | RI     | -                      | -                      | 0.03±0.00              | -         | -         | -         | - | -                      | - |
| 2,5-Dimethyltridecane  | 1400.3 | 56292-66-1 | RI     | -                      | -                      | 0.11±0.03              | -         | -         | -         | - | -                      | - |
| 2,3,5-Trimethylheptane | 1102.4 | 20278-85-7 | RI, MS | -                      | -                      | 0.33±0.07              | -         | -         | -         | - | -                      | - |
| Butane                 | 670.9  | 106-97-8   | RI     | -                      | -                      | -                      | -         | 0.01±0.01 | 0.01±0.01 | - | -                      | - |

|                          |        |            |        |                        |   |                        |                        |           |                        |                        |                         |                         |
|--------------------------|--------|------------|--------|------------------------|---|------------------------|------------------------|-----------|------------------------|------------------------|-------------------------|-------------------------|
| Heptane                  | 517.4  | 142-82-5   | RI     | -                      | - | -                      | 0.12±0.14 <sup>b</sup> | -         | 0.02±0.03 <sup>b</sup> | 1.09±0.85 <sup>a</sup> | 0.21±0.28 <sup>ab</sup> | 0.80±0.70 <sup>ab</sup> |
| Propane                  | 719.1  | 74-98-6    | RI     | -                      | - | -                      | 0.28±0.33              | 0.00±0.00 | -                      | -                      | -                       | -                       |
| 3-Methyl-heptadecane     | 1754   | 6418-44-6  | RI, MS | -                      | - | -                      | 0.01±0.01              | 0.03±0.03 | -                      | -                      | -                       | -                       |
| 2,3-Dimethylbutane       | 716.2  | 79-29-8    | RI     | -                      | - | -                      | -                      | 0.18±0.25 | -                      | -                      | -                       | -                       |
| 3-Methyl-heptane         | 612.5  | 589-81-1   | RI     | -                      | - | -                      | -                      | -         | 0.10±0.10              | -                      | -                       | -                       |
| 2-Nitro-propane          | 783    | 79-46-9    | RI     | -                      | - | -                      | -                      | -         | 0.00±0.00              | -                      | -                       | -                       |
| Neopentane               | 1486.7 | 463-82-1   | RI     | -                      | - | -                      | -                      | -         | 0.02±0.02              | -                      | -                       | -                       |
| 4-Propyl-heptane         | 2821.1 | 55044-10-5 | RI     | -                      | - | -                      | -                      | -         | 0.02±0.03              | -                      | -                       | -                       |
| Heptadecane              | 1634.5 | 629-78-7   | RI     | -                      | - | -                      | -                      | -         | -                      | 0.06±0.03              | 0.06±0.03               | 0.03±0.01               |
| Octadecane               | 1731.4 | 593-45-3   | RI     | -                      | - | -                      | -                      | -         | -                      | 0.04±0.01              |                         |                         |
| 2-Methyltridecane        | 1410.7 | 1560-96-9  | RI     | -                      | - | -                      | -                      | -         | -                      | -                      | 0.00±0.00               | 0.01±0.00               |
| 2-Undecanone             | 1569.3 | 112-12-9   | RI, MS | -                      | - | -                      | -                      | -         | -                      | -                      | 0.01±0.00               | -                       |
| 4-Methyldecane           | 1085.8 | 2847-72-5  | RI     | -                      | - | -                      | -                      | -         | -                      | -                      | -                       | 0.01±0.00               |
| 4-Methylundecanone       | 1136.2 | 2980-69-0  | RI, MS | -                      | - | -                      | -                      | -         | -                      | -                      | -                       | 0.01±0.00               |
| 3-Methylheptadecane      | 1701.2 | 6418-44-6  | RI, MS | -                      | - | -                      | -                      | -         | -                      | -                      | -                       | 0.01±0.00               |
| <i>Olefin</i>            |        |            |        |                        |   |                        |                        |           |                        |                        |                         |                         |
| 1-Decene                 | 1035.6 | 872-05-9   | RI, MS | 0.44±0.07 <sup>a</sup> | - | 0.14±0.04 <sup>b</sup> | -                      | -         | -                      | 0.00±0.00 <sup>c</sup> | 0.01±0.00 <sup>c</sup>  | 0.01±0.01 <sup>c</sup>  |
| 2-Octene                 | 1283.4 | 111-67-1   | RI, MS | 0.62±0.58              | - | -                      | -                      | -         | -                      | -                      | -                       | -                       |
| 5-Methyl-2-heptene       | 1760   | 22487-87-2 | RI     | 0.02±0.00              | - | -                      | -                      | -         | -                      | -                      | -                       | -                       |
| 3,5,5-Trimethyl-1-hexene | 549.7  | 4316-65-8  | RI     | 0.00±0.00              | - | -                      | -                      | -         | -                      | -                      | -                       | -                       |
| 3-Methyl-3-heptene       | 578.5  | 7300-03-0  | RI     | -                      | - | 0.01±0.01              | -                      | -         | -                      | -                      | -                       | -                       |
| 1,3-Octadiene            | 1486.2 | 1002-33-1  | RI, MS | -                      | - | 0.03±0.01              | -                      | -         | -                      | -                      | -                       | -                       |
| Propylene                | 1150.7 | 115-07-1   | RI     | -                      | - | -                      | 0.01±0.01              | 0.42±0.56 | 7.4±10.44              | -                      | -                       | -                       |

|                             |        |            |        |                         |   |                        |                        |                        |                        |                        |                        |                         |
|-----------------------------|--------|------------|--------|-------------------------|---|------------------------|------------------------|------------------------|------------------------|------------------------|------------------------|-------------------------|
| 1-Heptene                   | 535.9  | 592-76-7   | RI, MS | -                       | - | -                      | 0.06±0.06              | -                      | -                      | -                      | -                      | -                       |
| 1-Pentene                   | 1324.6 | 109-67-1   | RI     | -                       | - | -                      | 0.07±0.10              | -                      | -                      | -                      | -                      | -                       |
| 1-Hexene                    | 1451.5 | 592-41-6   | RI     | -                       | - | -                      | 0.05±0.07              | -                      | -                      | -                      | -                      | -                       |
| 7-Methyl-1-octene           | 1688.1 | 13151-06-9 | RI     | -                       | - | -                      | -                      | -                      | 0.00±0.01              | -                      | -                      | -                       |
| 9-Octadecene                | 2436.8 | 5090-41-5  | RI     | -                       | - | -                      | -                      | -                      | 0.15±0.09              | -                      | -                      | -                       |
| 1-Dodecene                  | 1219.5 | 112-41-4   | RI, MS | -                       | - | -                      | -                      | -                      | -                      | 0.01±0.00              | 0.01±0.00              | 0.01±0.01               |
| 2-Methyl-1-hexene           | 1030.2 | 6094-2-6   | RI     | -                       | - | -                      | -                      | -                      | -                      | 0.01±0.01              | -                      | -                       |
| 2,4-Dimethyl-2-pentene      | 693.3  | 625-65-0   | RI     | -                       | - | -                      | -                      | -                      | -                      | 0.07±0.01              | -                      | -                       |
| 3-Heptane                   | 1643.3 | 592-78-9   | RI     | -                       | - | -                      | -                      | -                      | -                      | 0.07±0.03              | -                      | -                       |
| 1-Tetradecene               | 1509   | 1120-36-1  | RI, MS | -                       | - | -                      | -                      | -                      | -                      | -                      | 0.00±0.00              | -                       |
| 6-Methyl-1-octene           | 1181.8 | 13151-10-5 | RI     | -                       | - | -                      | -                      | -                      | -                      | -                      | 0.01±0.01              | -                       |
| 5-Dodecene                  | 1267.3 | 7206-28-2  | RI     | -                       | - | -                      | -                      | -                      | -                      | -                      | -                      | 0.00±0.00               |
| 2,2-Dimethyl-3-octene       | 1000.4 | 86869-76-3 | RI     | -                       | - | -                      | -                      | -                      | -                      | -                      | -                      | 0.02±0.01               |
| <i>Pyrazine</i>             |        |            |        |                         |   |                        |                        |                        |                        |                        |                        |                         |
| Trimethyl pyrazine          | 1507.7 | 14667-55-1 | RI, MS | 1.29±0.89 <sup>b</sup>  | - | 2.68±0.81 <sup>a</sup> | 0.01±0.01 <sup>c</sup> | 0.44±0.32 <sup>c</sup> | 0.23±0.14 <sup>c</sup> | 0.23±0.14 <sup>c</sup> | 0.13±0.05 <sup>c</sup> | 0.68±0.20 <sup>bc</sup> |
| 2,3,5,6-Tetramethylpyrazine | 1532.2 | 1124-11-4  | RI, MS | 0.46±0.65               | - | 0.60±0.53              | -                      | -                      | 0.10±0.07              | 0.07±0.04              | 0.04±0.04              | 0.31±0.40               |
| 2,3-Dimethylpyrazine        | 1434.9 | 5910-89-4  | RI, MS | 0.43±0.25 <sup>a</sup>  | - | 0.21±0.06 <sup>b</sup> | -                      | -                      | 0.03±0.03 <sup>b</sup> | 0.04±0.02 <sup>b</sup> | 0.01±0.01 <sup>b</sup> | 0.04±0.02 <sup>b</sup>  |
| 2,6-Diethylpyrazine         | 1516.6 | 13067-27-1 | RI, MS | -                       | - | 0.09±0.08 <sup>a</sup> | -                      | 0.01±0.01 <sup>b</sup> | 0.01±0.01 <sup>b</sup> | 0.00±0.00 <sup>b</sup> | 0.00±0.00 <sup>b</sup> | 0.00±0.00 <sup>b</sup>  |
| 2-Methylpyrazine            | 1314.6 | 109-08-0   | RI, MS | 0.29±0.26               | - | -                      | -                      | -                      | 0.03±0.04              | -                      | -                      | -                       |
| 2,6-Dimethylpyrazine        | 1417   | 108-50-9   | RI, MS | 0.61±0.58 <sup>ab</sup> | - | 2.91±2.58 <sup>a</sup> | -                      | -                      | 0.14±0.10 <sup>b</sup> | -                      | 0.10±0.09 <sup>b</sup> | 0.83±0.86 <sup>ab</sup> |
| 2-Ethyl-6-methyl-pyrazine   | 1493.5 | 13925-03-6 | RI, MS | -                       | - | 0.20±0.03 <sup>a</sup> | -                      | -                      | -                      | 0.01±0.01 <sup>b</sup> | 0.01±0.00 <sup>b</sup> | 0.04±0.02 <sup>b</sup>  |
| Methyl pyrazine             | 1281.4 | 109-08-0   | RI, MS | -                       | - | 0.25±0.22 <sup>b</sup> | -                      | -                      | -                      | 0.05±0.03 <sup>b</sup> | 0.03±0.01 <sup>b</sup> | 0.06±0.03 <sup>a</sup>  |
| Vinyl pyrazine              | 1551.3 | 4177-16-6  | RI, MS | -                       | - | -                      | -                      | -                      | 0.13±0.18              | -                      | -                      | -                       |

|                                 |        |            |        |                         |                         |                        |                         |                         |                         |                         |                        |                         |
|---------------------------------|--------|------------|--------|-------------------------|-------------------------|------------------------|-------------------------|-------------------------|-------------------------|-------------------------|------------------------|-------------------------|
| Ethyl pyrazine                  | 2172.9 | 13925-00-3 | RI, MS | -                       | -                       | -                      | -                       | -                       | 0.07±0.09               | -                       | -                      | 0.83±0.86               |
| 2,5-Dimethylpyrazine            | 1354.5 | 123-32-0   | RI, MS | -                       | -                       | -                      | -                       | -                       | -                       | 0.40±0.18               | 0.00±0.00              | -                       |
| Pyrazine                        | 1865.9 | 290-37-9   | RI, MS | -                       | -                       | -                      | -                       | -                       | -                       | -                       | 0.00±0.00              | -                       |
| 2-Acetyl-3-methylpyrazine       | 1623.8 | 23787-80-6 | RI, MS | -                       | -                       | -                      | -                       | -                       | -                       | -                       | -                      | 0.00±0.00               |
| 2,3-Dimethyl-5-ethyl pyrazine   | 1504   | 15707-34-3 | RI, MS | -                       | -                       | -                      | -                       | -                       | -                       | -                       | -                      | 0.02±0.01               |
| 2,3,5-Trimethyl-6-ethylpyrazine | 1530.5 | 17398-16-2 | RI, MS | -                       | -                       | -                      | -                       | -                       | -                       | -                       | -                      | 0.01±0.01               |
| <i>Furan</i>                    |        |            |        |                         |                         |                        |                         |                         |                         |                         |                        |                         |
| 2-Pentylfuran                   | 1232.8 | 3777-69-3  | RI, MS | 0.22±0.21 <sup>ab</sup> | 0.34±0.18 <sup>ab</sup> | 0.58±0.49 <sup>a</sup> | 0.26±0.22 <sup>ab</sup> | 0.5±0.26 <sup>ab</sup>  | 0.43±0.38 <sup>ab</sup> | 0.04±0.03 <sup>ab</sup> | 0.02±0.01 <sup>b</sup> | 0.08±0.02 <sup>ab</sup> |
| 2-Ethyl-furan                   | 820.3  | 3208-16-0  | RI, MS | -                       | 0.04±0.05               | -                      | -                       | -                       | -                       | -                       | -                      | -                       |
| 5-Methyl-2-acetylfuran          | 1590.7 | 1193-79-9  | RI, MS | -                       | 0.01±0.01               | -                      | -                       | -                       | -                       | -                       | -                      | -                       |
| 2-Propyl-furan                  | 1515.9 | 4229-91-8  | RI, MS | -                       | -                       | -                      | 0.01±0.01               | 0.01±0.01               | -                       | 0.01±0.01               | 0.01±0.01              | -                       |
| 2-Hexyl-furan                   | 1581   | 3777-70-6  | RI, MS | -                       | -                       | -                      | 0.03±0.04               | -                       | 0.01±0.01               | -                       | -                      | -                       |
| 2-Methylfuran                   | 2105.1 | 534-22-5   | RI, MS | -                       | -                       | -                      | 0.00±0.00               | -                       | -                       | -                       | -                      | -                       |
| Furan                           | 1086.8 | 110-00-9   | RI, MS | -                       | -                       | -                      | -                       | -                       | 0.05±0.06               | 0.00±0.00               | -                      | -                       |
| 2-Ethyl-5-methyl-furan          | 1584.9 | 1703-52-2  | RI     | -                       | -                       | -                      | -                       | -                       | 0.01±0.01               | -                       | -                      | -                       |
| 2,5-Dibutylfuran                | 1161   | 72636-53-4 | RI     | -                       | -                       | -                      | -                       | -                       | -                       | 0.00±0.00               | 0.00±0.00              | 0.00±0.00               |
| 3-Methyl-furan                  | 1470.8 | 930-27-8   | RI, MS | -                       | -                       | -                      | -                       | -                       | -                       | 0.00±0.00               | -                      | -                       |
| <i>Sulfide</i>                  |        |            |        |                         |                         |                        |                         |                         |                         |                         |                        |                         |
| Dimethyl trisulfide             | 1455.4 | 3658-80-8  | RI, MS | 0.02±0.02 <sup>b</sup>  | 0.01±0.00 <sup>b</sup>  | 0.01±0.00 <sup>b</sup> | 1.21±0.99 <sup>a</sup>  | 0.65±0.10 <sup>ab</sup> | 0.34±0.19 <sup>b</sup>  | 0.00±0.00 <sup>b</sup>  | -                      | 0.00±0.00 <sup>b</sup>  |
| Dimethyl sulfide                | 557.9  | 75-18-3    | RI, MS | -                       | -                       | 0.05±0.00 <sup>a</sup> | -                       | 0.01±0.01 <sup>b</sup>  | -                       | 0.00±0.00 <sup>b</sup>  | -                      | -                       |
| Dimethyl disulfide              | 1048.4 | 624-92-0   | RI, MS | -                       | -                       | -                      | 0.95±1.34               | 1.71±2.39               | -                       | -                       | -                      | -                       |
| Dimethyl tetrasulfide           | 1693.9 | 5756-24-1  | RI, MS | -                       | -                       | -                      | -                       | 0.03±0.02               | -                       | -                       | -                      | -                       |
| Methyl mercaptan                | 510.6  | 74-93-1    | RI, MS | -                       | -                       | -                      | 0.38±0.28               | 0.16±0.12               | -                       | -                       | -                      | -                       |

Notes: “-” indicates that the substance is not detected whiles “0.00” indicates that the value is less than 0.01. All the value is expressed as the percentage of peak area (%). The relative percentage is the ratio of the volatile component to the total volatile aroma compounds in one aging time.

<sup>1</sup> Volatile component were identified by RI and MS

<sup>2</sup> Retention index, calculated according to peak time of series alkanes under the same gas phase conditions

<sup>a, b, c, d</sup> Means with different letters with in a row differ significantly ( $P < 0.05$ )
